# Supplementary material
Source: PubMed Central journal article supplement (PMC4790604)
Supplement: moot004135.ww1_default.pdf [file moot004135.ww1_default.pdf]

**Appendix 1: Variables used for multiple imputations. <sup>§</sup> Defined according to 1994 definitions; <sup>¶</sup> defined according to 2006 definitions (see text)**

| <b>Outcome</b>                                               | <b>Model type</b> | <b>Cohort</b> | <b>Range</b> | <b>Statistically significant multivariable predictors</b>                                                  |                                                                                                                                            |
|--------------------------------------------------------------|-------------------|---------------|--------------|------------------------------------------------------------------------------------------------------------|--------------------------------------------------------------------------------------------------------------------------------------------|
| Severe neurodevelopmental impairment <sup>¶</sup>            | logistic          | 2006          | 22-26wks     | Mother's ethnicity;<br>Cervical suture;<br>Suspected chorioamnionitis;                                     | CRIB-2 score;<br>Severe changes last CUSS;<br>Severe BPD;                                                                                  |
| Neurodevelopmental impairment <sup>¶</sup><br>(4 categories) | ordered logistic  | 2006          | 22-26wks     | Suspected chorioamnionitis;<br>Cervical suture;<br>Mother's ethnicity;<br>IMD per decile;<br>CRIB-2 score; | Enteral feeding by day 7;<br>Postnatal steroids for BPD (any); Severe changes any CUSS scan; Treated retinopathy;<br>In oxygen at 40w PMA; |
| Cognitive impairment<br>(3 categories: <55, 55-69, >69)      | ordered logistic  | 2006          | 22-26wks     | Mother's ethnicity;<br>Cervical suture;<br>Suspected chorioamnionitis;                                     | CRIB-2 score;<br>Severe changes last CUSS;<br>Severe BPD;                                                                                  |
| Disability <sup>§</sup><br>(3 categories)                    | ordered logistic  | 1995          | 22-25w       | Mother's ethnicity;<br>Male sex;<br>Any antenatal steroids given;<br>Non-cephalic vaginal delivery;        | Severe changes any CUSS scan; Treated retinopathy;<br>Postnatal steroids for BPD (w);<br>Any breast milk given                             |
| Disability <sup>§</sup><br>(3 categories)                    | ordered logistic  | 2006          | 22-25w       | Suspected chorioamnionitis;<br>CRIB-2 score;                                                               | Severe BPD;<br>Severe changes any CUSS scan;<br>In oxygen at 40w PMA                                                                       |
| Cerebral Palsy                                               | logistic          | 1995          | 22-25wks     | Mother smoked in pregnancy;<br>Suspected chorioamnionitis;<br>Full course of antenatal steroids;           | Transferred hospital within 24h; Enteral feeding by day 7;<br>Postnatal steroids for BPD (>6w);                                            |
| Cerebral Palsy                                               | logistic          | 2006          | 22-25wks     | Occlusive wrapping at birth;<br>Non-cephalic vaginal delivery;<br>CRIB-2 score;                            | Severe changes last CUSS;<br>Severe changes any CUSS scan;                                                                                 |
| Cerebral Palsy                                               | logistic          | 2006          | 22-26wks     | Occlusive wrapping at birth;<br>Non-cephalic vaginal delivery;                                             | Postnatal steroids for BPD (any);<br>Severe BPD;<br>Severe changes last CUSS;                                                              |
| MDI <55                                                      | logistic          | 1995          | 22-25wks     |                                                                                                            | Severe changes any CUSS scan;<br>Postnatal steroids for BPD (>6w);                                                                         |
| MDI/Predicted MDI <55                                        | logistic          | 2006          | 22-25wks     | Cervical suture;<br>Mother's ethnicity;<br>Suspected chorioamnionitis;                                     | Severe changes last CUSS scan;<br>Postnatal steroids for BPD (>6w);<br>Gestational age;<br>Birthweight for gestation and sex;              |
